# Supplementary material for: One-directional flow of ionic solutions along fine electrodes under an alternating current electric field
Source: PubMed Central journal article supplement (PMC6408404; doi:10.1098/rsos.180657), 2019-02-13
Supplement: rsos180657_review_history.pdf [file rsos180657_review_history.pdf]

## **One-directional flow of ionic solutions along fine electrodes under an alternating current electric field**

Jung Hwal Shin, Kanghyun Kim, Hyeonsu Woo, In Seok Kang, Hyun-Wook Kang, WooSeok Choi and Geunbae Lim

### **Article citation details**

*R. Soc. open sci.* **6**: 180657.

<http://dx.doi.org/10.1098/rsos.180657>

### **Review timeline**

Original submission: 23 May 2018  
1st revised submission: 10 September 2018  
2nd revised submission: 11 January 2019  
Final acceptance: 11 January 2019

Note: Reports are unedited and appear as submitted by the referee. The review history appears in chronological order.

## Review History

### RSOS-180657.R0 (Original submission)

#### Review form: Reviewer 1 (Brian Storey)

**Is the manuscript scientifically sound in its present form?**

Yes

**Are the interpretations and conclusions justified by the results?**

Yes

**Is the language acceptable?**

Yes

**Is it clear how to access all supporting data?**

No

**Do you have any ethical concerns with this paper?**

No

**Have you any concerns about statistical analyses in this paper?**

Yes

**Recommendation?**

Accept with minor revision (please list in comments)

**Comments to the Author(s)**

Overall the paper is interesting - it reports on some unusual experimental results that are not easily explained by any theory I am aware of. In the intro, the authors review several possibilities and conclude none of them explain. I have a few comments in no particular order.

- 1) The authors claim there are no reactions because there are no bubbles. Did they try to assess reactions in a more quantitative way, or does the small droplet size make this difficult - i.e. measure pH?
- 2) I didn't really understand the brackets and the stars in all the figures? I found it distracting from the otherwise pretty simple plots.
- 3) I didn't see a comment in the paper about how many repeats were done at each measurement. Are the error bars the scatter at that condition? Is it the  $n=7$ ? If so, be more explicit - i.e. say each experiment was repeated 7 times. If it was repeated, was it with a new CNT or the same CNT but different flow measurement? Just a sentence or two to explain how repeatable your results are.
- 4) The table at the end could be better formatted - or maybe all this data would be organized as supplementary material. In any case it was hard to figure out what you were showing there.
- 5) I don't understand why at 40 MHz you have 200 nL/min but can't measure lower than that. A little more explanation would be helpful here. I don't doubt the difficulty due to the scale here.
- 6) Caption for figure 7 plots frequency on one axis and then reports a frequency in the caption. That seems confusing.
- 7) The comment in the caption about values compared by a t-test seems unusual. I don't really know what you mean by this comment. Are you trying to claim the data are statistically significantly different? Why not just show the data with the error bars?

## Review form: Reviewer 2

**Is the manuscript scientifically sound in its present form?**

Yes

**Are the interpretations and conclusions justified by the results?**

No

**Is the language acceptable?**

Yes

**Is it clear how to access all supporting data?**

Not Applicable

**Do you have any ethical concerns with this paper?**

No

**Have you any concerns about statistical analyses in this paper?**

I do not feel qualified to assess the statistics

**Recommendation?**

Major revision is needed (please make suggestions in comments)

**Comments to the Author(s)**

The authors explore the transport of aqueous electrolytes under imposed high frequency (MHz) electric fields in a geometry that consists of a planar electrode upon which the electrolyte drop sits and a vertically held carbon nanotube coated tungsten wire in contact with the drop. Under certain conditions, they observe that the electrolyte migrate up the tungsten wire.

They make the assertion that this is a previously unreported behavior and that it cannot be explained by existing theories, namely, dielectrophoresis, induced charge electroosmosis, travelling wave, AC, and rectified AC electroosmosis. While this may indeed be a novel phenomenon, it is my opinion that they have not done an adequate job of exploring the details of the other theories that they present, nor have they included all electrokinetic phenomena. Furthermore, they present their experimental observations, but provide no theoretical explanation for the observed behavior. I would recommend publication only after major revisions to the manuscript. My specific comments are below:

1. In the introduction, dielectrophoresis, induced charge electroosmosis, travelling wave, AC, and rectified AC electroosmosis are all listed as possibly related and the authors attempt to explain why each theory is inadequate. The treatment is qualitative and sparse. I suggest the authors include a more detailed treatment of each of these theories, presenting the relevant equations that explain fluid flow under each theory and then explain why the presented experiment does not fit with theory.

2. On line 26, the statement "the mechanism of 'ICEO' is based on the movement of small particles, however, the discovered phenomenon happens without any particles" is false. ICEO can occur around any polarizable surface. The authors cite: Squires, T. M.; Bazant, M. Z. Induced-Charge Electro-Osmosis. *Journal of Fluid Mechanics* 2004, 509, 217-252. I encourage the authors to re-read section 5 that describe ICEO flow around electrically floating electrodes in microfluidic devices.

3. There are several other electrokinetic phenomena that the authors neglect to consider as possible explanations of the observed effect:

Electrowetting: The presented setup is similar to those found in the electrowetting literature. The following review may be helpful in assessing: Mugele, Frieder, and Jean-Christophe Baret. "Electrowetting: From Basics to Applications." *Journal of Physics: Condensed Matter* 17, no. 28 (2005): R705. <https://doi.org/10.1088/0953-8984/17/28/R01>.

Electrothermal flows: For example, theories presented in: García-Sánchez, Pablo, Antonio Ramos, and Frieder Mugele. "Electrothermally Driven Flows in Ac Electrowetting." *Physical Review E* 81, no. 1 (January 2010). <https://doi.org/10.1103/PhysRevE.81.015303>. González, A., A. Ramos, H. Morgan, N. G. Green, and A. Castellanos. "Electrothermal Flows Generated by

Alternating and Rotating Electric Fields in Microsystems." *Journal of Fluid Mechanics* 564 (October 2006): 415. <https://doi.org/10.1017/S0022112006001595>.

Electrohydrodynamic flows: For example, theories presented in: Esmaeeli, Asghar, and Payam Sharifi. "Transient Electrohydrodynamics of a Liquid Drop." *Physical Review E* 84, no. 3 (2011): 036308. <https://doi.org/10.1103/PhysRevE.84.036308>. Ristenpart, W. D, I. A Aksay, and D. A Saville. "Electrohydrodynamic Flow around a Colloidal Particle near an Electrode with an Oscillating Potential." *Journal of Fluid Mechanics* 575 (2007): 83-109.

4. The authors should perform a flow visualization experiment, such as micro-PIV, to look at flow patterns in the system during the experiment. This will help to determine a possible mechanism.

5. The authors provide no competing theory to explain their observations. If it isn't a well established theory, then what is the physical mechanism that is driving the flow?

6. The authors should provide more detail on the experimental setup. Specifically, details on the electronics utilized for the experiment. For instance, what is the model number of the power supply used? How much current was flowing during the experiment? What is the conductivity of the electrolytes?

With these significant revisions, I feel that the manuscript would be more impactful to the community.

## Decision letter (RSOS-180657.R0)

03-Aug-2018

Dear Professor Shin,

The editors assigned to your paper ("One-directional flow of ionic solutions along fine electrodes under an alternating current electric field") have now received comments from reviewers. We would like you to revise your paper in accordance with the referee and Associate Editor suggestions which can be found below (not including confidential reports to the Editor). Please note this decision does not guarantee eventual acceptance.

Please submit a copy of your revised paper before 26-Aug-2018. Please note that the revision deadline will expire at 00.00am on this date. If we do not hear from you within this time then it will be assumed that the paper has been withdrawn. In exceptional circumstances, extensions may be possible if agreed with the Editorial Office in advance. We do not allow multiple rounds of revision so we urge you to make every effort to fully address all of the comments at this stage. If deemed necessary by the Editors, your manuscript will be sent back to one or more of the original reviewers for assessment. If the original reviewers are not available, we may invite new reviewers.

To revise your manuscript, log into <http://mc.manuscriptcentral.com/rsos> and enter your Author Centre, where you will find your manuscript title listed under "Manuscripts with Decisions." Under "Actions," click on "Create a Revision." Your manuscript number has been appended to denote a revision. Revise your manuscript and upload a new version through your Author Centre.

When submitting your revised manuscript, you must respond to the comments made by the referees and upload a file "Response to Referees" in "Section 6 - File Upload". Please use this to document how you have responded to the comments, and the adjustments you have made. In order to expedite the processing of the revised manuscript, please be as specific as possible in your response.

In addition to addressing all of the reviewers' and editor's comments please also ensure that your revised manuscript contains the following sections as appropriate before the reference list:

- Ethics statement (if applicable)

If your study uses humans or animals please include details of the ethical approval received, including the name of the committee that granted approval. For human studies please also detail whether informed consent was obtained. For field studies on animals please include details of all permissions, licences and/or approvals granted to carry out the fieldwork.

- Data accessibility

It is a condition of publication that all supporting data are made available either as supplementary information or preferably in a suitable permanent repository. The data accessibility section should state where the article's supporting data can be accessed. This section should also include details, where possible of where to access other relevant research materials such as statistical tools, protocols, software etc can be accessed. If the data have been deposited in an external repository this section should list the database, accession number and link to the DOI for all data from the article that have been made publicly available. Data sets that have been deposited in an external repository and have a DOI should also be appropriately cited in the manuscript and included in the reference list.

If you wish to submit your supporting data or code to Dryad (<http://datadryad.org/>), or modify your current submission to dryad, please use the following link:  
<http://datadryad.org/submit?journalID=RSOS&manu=RSOS-180657>

- Competing interests

Please declare any financial or non-financial competing interests, or state that you have no competing interests.

- Authors' contributions

All submissions, other than those with a single author, must include an Authors' Contributions section which individually lists the specific contribution of each author. The list of Authors should meet all of the following criteria; 1) substantial contributions to conception and design, or acquisition of data, or analysis and interpretation of data; 2) drafting the article or revising it critically for important intellectual content; and 3) final approval of the version to be published.

All contributors who do not meet all of these criteria should be included in the acknowledgements.

We suggest the following format:

AB carried out the molecular lab work, participated in data analysis, carried out sequence alignments, participated in the design of the study and drafted the manuscript; CD carried out the statistical analyses; EF collected field data; GH conceived of the study, designed the study, coordinated the study and helped draft the manuscript. All authors gave final approval for publication.

- Acknowledgements

Please acknowledge anyone who contributed to the study but did not meet the authorship criteria.

- Funding statement

Please list the source of funding for each author.

Please note that Royal Society Open Science charge article processing charges for all new submissions that are accepted for publication. Charges will also apply to papers transferred to Royal Society Open Science from other Royal Society Publishing journals, as well as papers submitted as part of our collaboration with the Royal Society of Chemistry (<http://rsos.royalsocietypublishing.org/chemistry>). If your manuscript is newly submitted and subsequently accepted for publication, you will be asked to pay the article processing charge, unless you request a waiver and this is approved by Royal Society Publishing. You can find out more about the charges at <http://rsos.royalsocietypublishing.org/page/charges>. Should you have any queries, please contact [openscience@royalsociety.org](mailto:openscience@royalsociety.org).

Once again, thank you for submitting your manuscript to Royal Society Open Science and I look forward to receiving your revision. If you have any questions at all, please do not hesitate to get in touch.

Kind regards,  
Andrew Dunn  
Senior Publishing Editor  
Royal Society Open Science Editorial Office  
Royal Society Open Science  
[openscience@royalsociety.org](mailto:openscience@royalsociety.org)

on behalf of Dr Oliver Jensen (Associate Editor) and R. Kerry Rowe (Subject Editor)  
[openscience@royalsociety.org](mailto:openscience@royalsociety.org)

Associate Editor's comments (Dr Oliver Jensen):

Reviewers have assessed your paper and have indicated that major revisions are necessary if it is to be suitable for publication. Please therefore revise your paper in line with the recommendations of the reviewers, providing a point-by-point response to each issue raised by the reviewers. Your revised study will be subject to further review.

Comments to Author:

Reviewers' Comments to Author:

Reviewer: 1

Comments to the Author(s)

Overall the paper is interesting - it reports on some unusual experimental results that are not easily explained by any theory I am aware of. In the intro, the authors review several possibilities and conclude none of them explain. I have a few comments in no particular order.

1) The authors claim there are no reactions because there are no bubbles. Did they try to assess reactions in a more quantitative way, or does the small droplet size make this difficult - i.e. measure pH?

- 2) I didn't really understand the brackets and the stars in all the figures? I found it distracting from the otherwise pretty simple plots.
- 3) I didn't see a comment in the paper about how many repeats were done at each measurement. Are the error bars the scatter at that condition? Is it the  $n=7$ ? If so, be more explicit - i.e. say each experiment was repeated 7 times. If it was repeated, was it with a new CNT or the same CNT but different flow measurement? Just a sentence or two to explain how repeatable your results are.
- 4) The table at the end could be better formatted - or maybe all this data would be organized as supplementary material. In any case it was hard to figure out what you were showing there.
- 5) I don't understand why at 40 MHz you have 200 nL/min but can't measure lower than that. A little more explanation would be helpful here. I don't doubt the difficulty due to the scale here.
- 6) Caption for figure 7 plots frequency on one axis and then reports a frequency in the caption. That seems confusing.
- 7) The comment in the caption about values compared by a t-test seems unusual. I don't really know what you mean by this comment. Are you trying to claim the data are statistically significantly different? Why not just show the data with the error bars?

Reviewer: 2

Comments to the Author(s)

The authors explore the transport of aqueous electrolytes under imposed high frequency (MHz) electric fields in a geometry that consists of a planar electrode upon which the electrolyte drop sits and a vertically held carbon nanotube coated tungsten wire in contact with the drop. Under certain conditions, they observe that the electrolyte migrate up the tungsten wire.

They make the assertion that this is a previously unreported behavior and that it cannot be explained by existing theories, namely, dielectrophoresis, induced charge electroosmosis, travelling wave, AC, and rectified AC electroosmosis. While this may indeed be a novel phenomenon, it is my opinion that they have not done an adequate job of exploring the details of the other theories that they present, nor have they included all electrokinetic phenomena. Furthermore, they present their experimental observations, but provide no theoretical explanation for the observed behavior. I would recommend publication only after major revisions to the manuscript. My specific comments are below:

1. In the introduction, dielectrophoresis, induced charge electroosmosis, travelling wave, AC, and rectified AC electroosmosis are all listed as possibly related and the authors attempt to explain why each theory is inadequate. The treatment is qualitative and sparse. I suggest the authors include a more detailed treatment of each of these theories, presenting the relevant equations that explain fluid flow under each theory and then explain why the presented experiment does not fit with theory.
2. On line 26, the statement "the mechanism of 'ICEO' is based on the movement of small particles, however, the discovered phenomenon happens without any particles" is false. ICEO can occur around any polarizable surface. The authors cite: Squires, T. M.; Bazant, M. Z. Induced-Charge Electro-Osmosis. *Journal of Fluid Mechanics* 2004, 509, 217-252. I encourage the authors to re-read section 5 that describe ICEO flow around electrically floating electrodes in microfluidic devices.

3. There are several other electrokinetic phenomena that the authors neglect to consider as possible explanations of the observed effect:

Electrowetting: The presented setup is similar to those found in the electrowetting literature. The following review may be helpful in assessing: Mugele, Frieder, and Jean-Christophe Baret. "Electrowetting: From Basics to Applications." *Journal of Physics: Condensed Matter* 17, no. 28 (2005): R705. <https://doi.org/10.1088/0953-8984/17/28/R01>.

Electrothermal flows: For example, theories presented in: García-Sánchez, Pablo, Antonio Ramos, and Frieder Mugele. "Electrothermally Driven Flows in Ac Electrowetting." *Physical Review E* 81, no. 1 (January 2010). <https://doi.org/10.1103/PhysRevE.81.015303>. González, A., A. Ramos, H. Morgan, N. G. Green, and A. Castellanos. "Electrothermal Flows Generated by Alternating and Rotating Electric Fields in Microsystems." *Journal of Fluid Mechanics* 564 (October 2006): 415. <https://doi.org/10.1017/S0022112006001595>.

Electrohydrodynamic flows: For example, theories presented in: Esmaeeli, Asghar, and Payam Sharifi. "Transient Electrohydrodynamics of a Liquid Drop." *Physical Review E* 84, no. 3 (2011): 036308. <https://doi.org/10.1103/PhysRevE.84.036308>. Ristenpart, W. D, I. A Aksay, and D. A Saville. "Electrohydrodynamic Flow around a Colloidal Particle near an Electrode with an Oscillating Potential." *Journal of Fluid Mechanics* 575 (2007): 83–109.

4. The authors should perform a flow visualization experiment, such as micro-PIV, to look at flow patterns in the system during the experiment. This will help to determine a possible mechanism.

5. The authors provide no competing theory to explain their observations. If it isn't a well established theory, then what is the physical mechanism that is driving the flow?

6. The authors should provide more detail on the experimental setup. Specifically, details on the electronics utilized for the experiment. For instance, what is the model number of the power supply used? How much current was flowing during the experiment? What is the conductivity of the electrolytes?

With these significant revisions, I feel that the manuscript would be more impactful to the community.

## Author's Response to Decision Letter for (RSOS-180657.R0)

Thank you for your kind handling of our manuscript. In this manuscript, we responded to the reviewer comments and all changes in our manuscript were highlighted.

## RSOS-180657.R1 (Revision)

### Review form: Reviewer 2

**Is the manuscript scientifically sound in its present form?**

Yes



**Are the interpretations and conclusions justified by the results?**

No

**Is the language acceptable?**

Yes

**Is it clear how to access all supporting data?**

Yes

**Do you have any ethical concerns with this paper?**

No

**Have you any concerns about statistical analyses in this paper?**

I do not feel qualified to assess the statistics

**Recommendation?**

Accept with minor revision (please list in comments)

**Comments to the Author(s)**

The authors have included additional details of electrokinetic theories in the text as I recommended in the initial review; however, some of the analysis given, in particular, on electrowetting is difficult to follow. I believe more analysis needs to be performed beyond the qualitative explanation given by the authors. In specific:

Will the authors please provide more explanation for this statement: "However, electrowetting differs from the phenomenon we describe in that an insulating layer is placed between the mother droplet and the plane electrode; this renders monodirectional flow impossible"

To my knowledge, electrowetting usually performed on a dielectric layer to limit Faradaic reactions. Electrowetting can and does occur on bare metal electrodes as well. Regardless, I do not see how the presence of an insulator means that monodirectional flow is impossible. Please explain.

Also, the field is very high near the tip of the nanotube. The authors state that the CNT has a diameter of  $\sim 1$  nm, and the effect appears at  $>5$  Vpp. This means that peak electric fields near the CNT tip are on the order of  $10^9$  V/m. This is much higher than the dielectric breakdown strength of water which is  $\sim 70 \times 10^6$  V/m. Is it possible that this effect is due to electrical breakdown?

## Decision letter (RSOS-180657.R1)

11-Dec-2018

Dear Professor Shin:

On behalf of the Editors, I am pleased to inform you that your Manuscript RSOS-180657.R1 entitled "One-directional flow of ionic solutions along fine electrodes under an alternating current electric field" has been accepted for publication in Royal Society Open Science subject to minor revision in accordance with the referee suggestions. Please find the referees' comments at the end of this email.

The reviewers and Subject Editor have recommended publication, but also suggest some minor revisions to your manuscript. Therefore, I invite you to respond to the comments and revise your manuscript.

- Ethics statement

If your study uses humans or animals please include details of the ethical approval received, including the name of the committee that granted approval. For human studies please also detail whether informed consent was obtained. For field studies on animals please include details of all permissions, licences and/or approvals granted to carry out the fieldwork.

- Data accessibility

It is a condition of publication that all supporting data are made available either as supplementary information or preferably in a suitable permanent repository. The data accessibility section should state where the article's supporting data can be accessed. This section should also include details, where possible of where to access other relevant research materials such as statistical tools, protocols, software etc can be accessed. If the data has been deposited in an external repository this section should list the database, accession number and link to the DOI for all data from the article that has been made publicly available. Data sets that have been deposited in an external repository and have a DOI should also be appropriately cited in the manuscript and included in the reference list.

If you wish to submit your supporting data or code to Dryad (<http://datadryad.org/>), or modify your current submission to dryad, please use the following link:  
<http://datadryad.org/submit?journalID=RSOS&manu=RSOS-180657.R1>

- Competing interests

Please declare any financial or non-financial competing interests, or state that you have no competing interests.

- Authors' contributions

All submissions, other than those with a single author, must include an Authors' Contributions section which individually lists the specific contribution of each author. The list of Authors should meet all of the following criteria; 1) substantial contributions to conception and design, or acquisition of data, or analysis and interpretation of data; 2) drafting the article or revising it critically for important intellectual content; and 3) final approval of the version to be published.

All contributors who do not meet all of these criteria should be included in the acknowledgements.

We suggest the following format:

AB carried out the molecular lab work, participated in data analysis, carried out sequence alignments, participated in the design of the study and drafted the manuscript; CD carried out the statistical analyses; EF collected field data; GH conceived of the study, designed the study, coordinated the study and helped draft the manuscript. All authors gave final approval for publication.

- Acknowledgements

Please acknowledge anyone who contributed to the study but did not meet the authorship criteria.

- Funding statement

Please list the source of funding for each author.

Please note that we cannot publish your manuscript without these end statements included. We have included a screenshot example of the end statements for reference. If you feel that a given heading is not relevant to your paper, please nevertheless include the heading and explicitly state that it is not relevant to your work.

Because the schedule for publication is very tight, it is a condition of publication that you submit the revised version of your manuscript before 20-Dec-2018. Please note that the revision deadline will expire at 00.00am on this date. If you do not think you will be able to meet this date please let me know immediately.

To revise your manuscript, log into <https://mc.manuscriptcentral.com/rsos> and enter your Author Centre, where you will find your manuscript title listed under "Manuscripts with Decisions". Under "Actions," click on "Create a Revision." You will be unable to make your revisions on the originally submitted version of the manuscript. Instead, revise your manuscript and upload a new version through your Author Centre.

When submitting your revised manuscript, you will be able to respond to the comments made by the referees and upload a file "Response to Referees" in "Section 6 - File Upload". You can use this to document any changes you make to the original manuscript. In order to expedite the processing of the revised manuscript, please be as specific as possible in your response to the referees.

When uploading your revised files please make sure that you have:

- 1) A text file of the manuscript (tex, txt, rtf, docx or doc), references, tables (including captions) and figure captions. Do not upload a PDF as your "Main Document".
- 2) A separate electronic file of each figure (EPS or print-quality PDF preferred (either format should be produced directly from original creation package), or original software format)
- 3) Included a 100 word media summary of your paper when requested at submission. Please ensure you have entered correct contact details (email, institution and telephone) in your user account
- 4) Included the raw data to support the claims made in your paper. You can either include your data as electronic supplementary material or upload to a repository and include the relevant doi within your manuscript
- 5) All supplementary materials accompanying an accepted article will be treated as in their final form. Note that the Royal Society will neither edit nor typeset supplementary material and it will be hosted as provided. Please ensure that the supplementary material includes the paper details where possible (authors, article title, journal name).

Supplementary files will be published alongside the paper on the journal website and posted on the online figshare repository (<https://figshare.com>). The heading and legend provided for each supplementary file during the submission process will be used to create the figshare page, so please ensure these are accurate and informative so that your files can be found in searches. Files on figshare will be made available approximately one week before the accompanying article so that the supplementary material can be attributed a unique DOI.

Once again, thank you for submitting your manuscript to Royal Society Open Science and I look forward to receiving your revision. If you have any questions at all, please do not hesitate to get in touch.

Kind regards,  
Andrew Dunn

Royal Society Open Science Editorial Office  
Royal Society Open Science  
openscience@royalsociety.org

on behalf of Dr Oliver Jensen (Associate Editor) and R. Kerry Rowe (Subject Editor)  
openscience@royalsociety.org

Associate Editor Comments to Author (Dr Oliver Jensen):

Associate Editor: 1

Comments to the Author:

Please make a further revision of your paper to address the specific points raised by the reviewer. In particular, please remove the assertion (sentence 2 of the Conclusions) that "The discovered phenomenon ... cannot be explained using previous theories." This comment is not fully supported by your analysis.

In addition to dielectric breakdown as a candidate mechanism of the effect, please also comment on the possibility of acoustic (steady) streaming as a possible mechanism.

Reviewer comments to Author:

Reviewer: 2

Comments to the Author(s)

The authors have included additional details of electrokinetic theories in the text as I recommended in the initial review; however, some of the analysis given, in particular, on electrowetting is difficult to follow. I believe more analysis needs to be performed beyond the qualitative explanation given by the authors. In specific:

Will the authors please provide more explanation for this statement: "However, electrowetting differs from the phenomenon we describe in that an insulating layer is placed between the mother droplet and the plane electrode; this renders monodirectional flow impossible"

To my knowledge, electrowetting usually performed on a dielectric layer to limit Faradaic reactions. Electrowetting can and does occur on bare metal electrodes as well. Regardless, I do not see how the presence of an insulator means that monodirectional flow is impossible. Please explain.

Also, the field is very high near the tip of the nanotube. The authors state that the CNT has a diameter of  $\sim 1$  nm, and the effect appears at  $>5V_{pp}$ . This means that peak electric fields near the CNT tip are on the order of  $10^9$  V/m. This is much higher than the dielectric breakdown strength of water which is  $\sim 70 \times 10^6$  V/m. Is it possible that this effect is due to electrical breakdown?

## Author's Response to Decision Letter for (RSOS-180657.R1)

See Appendix A.

## Decision letter (RSOS-180657.R2)

11-Jan-2019

Dear Professor Shin,

I am pleased to inform you that your manuscript entitled "One-directional flow of ionic solutions along fine electrodes under an alternating current electric field" is now accepted for publication in Royal Society Open Science.

You can expect to receive a proof of your article in the near future. Please contact the editorial office ([openscience\\_proofs@royalsociety.org](mailto:openscience_proofs@royalsociety.org) and [openscience@royalsociety.org](mailto:openscience@royalsociety.org)) to let us know if you are likely to be away from e-mail contact. Due to rapid publication and an extremely tight schedule, if comments are not received, your paper may experience a delay in publication.

Royal Society Open Science operates under a continuous publication model (<http://bit.ly/cpFAQ>). Your article will be published straight into the next open issue and this will be the final version of the paper. As such, it can be cited immediately by other researchers. As the issue version of your paper will be the only version to be published I would advise you to check your proofs thoroughly as changes cannot be made once the paper is published.

On behalf of the Editors of Royal Society Open Science, we look forward to your continued contributions to the Journal.

Kind regards,  
Andrew Dunn  
Royal Society Open Science Editorial Office  
Royal Society Open Science  
[openscience@royalsociety.org](mailto:openscience@royalsociety.org)

on behalf of Dr Oliver Jensen (Associate Editor) and R. Kerry Rowe (Subject Editor)  
[openscience@royalsociety.org](mailto:openscience@royalsociety.org)

Follow Royal Society Publishing on Twitter: @RSocPublishing

Follow Royal Society Publishing on Facebook:

<https://www.facebook.com/RoyalSocietyPublishing.FanPage/>

Read Royal Society Publishing's blog: <https://blogs.royalsociety.org/publishing/>

## Appendix A

Associate Editor Comments to Author (Dr Oliver Jensen):

Associate Editor: 1

Comments to the Author:

Please make a further revision of your paper to address the specific points raised by the reviewer. In particular, please remove the assertion (sentence 2 of the Conclusions) that "The discovered phenomenon ... cannot be explained using previous theories." This comment is not fully supported by your analysis.

In addition to dielectric breakdown as a candidate mechanism of the effect, please also comment on the possibility of acoustic (steady) streaming as a possible mechanism.

: We changed the manuscript considering your comments.

Acoustic streaming is a steady flow caused by the absorption of high amplitude of acoustic vibration. According to Ko et al., the amplitude of the liquid air interface decreases as the frequency at which the AC electric field applied, and vibration is hardly observed at frequencies higher than 8 kHz [1]. Since AC electric field with frequencies of several tens of MHz is applied in this experiment, it is difficult to deduce it as flow by acoustic streaming.

[1] Ko et al., "Hydrodynamic Flows in Electrowetting", Langmuir, 2008, 24, 1094

Reviewer comments to Author:

Reviewer: 2

Comments to the Author(s)

The authors have included additional details of electrokinetic theories in the text as I recommended in the initial review; however, some of the analysis given, in particular, on electrowetting is difficult to follow. I believe more analysis needs to be performed beyond the qualitative explanation given by the authors. In specific:

Will the authors please provide more explanation for this statement:

"However, electrowetting differs from the phenomenon we describe in that an insulating layer is placed between the mother droplet and the plane electrode; this renders monodirectional flow impossible"

To my knowledge, electrowetting usually performed on a dielectric layer to limit Faradaic reactions. Electrowetting can and does occur on bare metal electrodes a well. Regardless, I do not see how the presences of an insulator mean that monodirectional flow is impossible. Please explain.

: We looked up the relevant data after the reviewer's opinion that electrowetting can and does occur on bare metal electrodes a well. In our investigation, electrowetting is generally difficult to occur on the surface of solid conductor (1) and in the case of liquid metals such as Ga, electrowetting can occur on metal surfaces because a thin oxide layer is formed on the metal surface (2). We have found a paper on electrowetting on bare electrodes using stainless steel as an electrode (3). In this case, the response was much slower than EWOD. One directional liquid pumping occurs at frequencies of tens of MHz and it is higher than ordinary AC EWOD frequencies. Since the response time of electrowetting on bare metal electrode is much slower than that of EWOD, which will lead to a larger difference in the frequency range. In addition, liquid pumping does not be observed when as insulating layer laid on the gold electrode surface such as EWOD structures.

(1) Deborah J. Lomax et al. "Ultra-low voltage electrowetting using graphite surface", *Soft Matter*, 2016, 12, 8798

(2) Collin B. Eaker et al. "Electrowetting without external voltage using paint-on electrodes", *Lab Chip*, 2017, 17, 1069

(3) Yanna Liu et al. "Ultralow voltage irreversible electrowetting dynamics of an aqueous drop on a stainless steel surface" Langmuir, 2015,31,3840

Also, the field is very high near the tip of the nanotube. The authors state that the CNT has a diameter of  $\sim 1$  nm, and the effect appears at  $>5V_{pp}$ . This means that peak electric fields near the CNT tip are on the order of  $10^9$  V/m. This is much higher than the dielectric breakdown strength of water which is  $\sim 70 \times 10^6$  V/m. Is it possible that this effect is due to electrical breakdown?

: The diameter of CNT nanowires coated by gold nanoparticles were about 800 nm. Thus, the peak electric fields near CNT nanowires are on the order of  $\sim 6.25$  M V/m. This value is smaller than the dielectric breakdown strength of water.
